# Supplementary material
Source: ML conference proceedings conference paper supplement (https://openaccess.thecvf.com/content/WACV2023/html/Liu_EfficientPhys_Enabling_Simple_WACV_2023_paper.html)
Supplement: Supplementary file 1 [file Liu_EfficientPhys_Enabling_Simple_WACV_2023_supplemental.pdf]

# EfficientPhys: Enabling Simple, Fast and Accurate Camera-Based Cardiac Measurement

Xin Liu<sup>1</sup>, Brian Hill<sup>2</sup>, Ziheng Jiang<sup>1</sup>, Shwetak Patel<sup>1</sup>, Daniel McDuff<sup>3</sup>

Paul G. Allen School of Computer Science & Engineering, University of Washington, Seattle, WA, USA<sup>1</sup>

Department of Computer Science, University of California, Los Angeles, CA, USA<sup>2</sup>

Microsoft Research, Redmond, WA, USA<sup>3</sup>

{xliu0, shwetak, ziheng}@cs.washington.edu

brian.l.hill@cs.ucla.edu, damcduff@microsoft.com

## 1. Additional Results

We further evaluated our proposed models on the MAHNOB-HCI dataset [4] and compared against other state-of-the-art on-device methods in Table 1. The MAHNOB-HCI dataset contains 527 videos in total with 27 subjects (12 males and 15 females). The ground truth heart rate were computed on the provided ECG waveform, and the sampling rate is 61hz. To calculate the heart rate from estimated facial PPG, we applied a band-pass filter to the signal with a cutoff frequency of 0.75 and 2Hz (45 beats/minute to 120 beats/minute) and then used FFT to calculate corresponding heart rates. As Table 1 illustrates, EfficientPhys-C achieves the best performance across six different on-device methods. Unfortunately, the results of POS are not available on previous literature.

Table 1. Cross-dataset heart rate evaluation on MAHNOB-HCI (beats per minute).

| Method           | MAHNOB-HCI [4] |        |       |          |
|------------------|----------------|--------|-------|----------|
|                  | MAE↓           | MAPE↓  | RMSE↓ | $\rho$ ↑ |
| EfficientPhys-C  | 6.16           | 8.39%  | 8.71  | 0.69     |
| EfficientPhys-T1 | 11.67          | 16.25% | 14.89 | 0.01     |
| EfficientPhys-T2 | 11.34          | 15.91% | 14.15 | 0.09     |
| TS-CAN[2]        | 7.47           | 10.13% | 10.75 | 0.50     |
| POS[5]           | NA             | NA     | NA    | NA       |
| CHROM[1]         | 13.49          | NA     | 22.36 | 0.21     |
| ICA[3]           | NA             | NA     | 13.60 | 0.36     |

MAE = Mean Absolute Error in HR estimation, MAPE = Mean Absolute Error Percentage in HR estimation, RMSE = Root Mean Square Error in HR estimation,  $\rho$  = Pearson Correlation in HR estimation.

tactless vitals measurement. *Advances in Neural Information Processing Systems*, 33:19400–19411, 2020.

- [3] Ming-Zher Poh, Daniel J McDuff, and Rosalind W Picard. Advancements in noncontact, multiparameter physiological measurements using a webcam. *IEEE transactions on biomedical engineering*, 58(1):7–11, 2010.
- [4] Mohammad Soleymani, Jeroen Lichtenauer, Thierry Pun, and Maja Pantic. A multimodal database for affect recognition and implicit tagging. *IEEE transactions on affective computing*, 3(1):42–55, 2011.
- [5] Wenjin Wang, Albertus C. den Brinker, Sander Stuijk, and Gerard de Haan. Algorithmic Principles of Remote PPG. *IEEE Transactions on Biomedical Engineering*, 64(7):1479–1491, July 2017. Conference Name: IEEE Transactions on Biomedical Engineering.

## References

- [1] Gerard De Haan and Vincent Jeanne. Robust pulse rate from chrominance-based rppg. *IEEE Transactions on Biomedical Engineering*, 60(10):2878–2886, 2013.
- [2] Xin Liu, Josh Fromm, Shwetak Patel, and Daniel McDuff. Multi-task temporal shift attention networks for on-device con-
